# Supplementary material
Source: publisher figshare collection journal article supplement (https://gsajournals.figshare.com/ndownloader/files/12853535)
Supplement: Supplementary file 1 [file 12853535]

## Sheet: 1h-AR vs naive
MB- 1h-AR vs naive. Mean gene count >50. FDR <0.05								WH- 1h-AR vs naive. Mean gene count >50. FDR <0.05
Gene Name	Flybase ID	baseMean	Log2 Fold Change	Fold Difference	FDR Q Value			Gene Name	Flybase ID	baseMean	Log2 Fold Change	Fold Difference	FDR Q Value
Hr3	FBgn0000448	2772.58	1.0888	2.12697	0.0198138			IM4	FBgn0040653	2356.52	2.37514	5.18785	5.3334e-14
Dro	FBgn0010388	1570.06	1.0722	2.10264	0.0429636			mt:ND1	FBgn0013679	23705.2	2.00508	4.01411	2.76439e-16
jeb	FBgn0086677	25837.8	1.05941	2.08408	3.15993e-09			IM3	FBgn0040736	5087.07	1.96514	3.90451	1.07664e-08
Pzl	FBgn0267430	20877.2	1.03064	2.04293	7.72961e-05			CG5778	FBgn0038930	4268.51	1.85778	3.62449	2.66166e-07
Rbp1-like	FBgn0030479	28034.8	0.941855	1.921	0.000159879			mt:ND5	FBgn0013684	15022.4	1.81888	3.52808	1.35263e-11
CG7222	FBgn0033551	1281.81	0.940937	1.91978	0.0373551			vri	FBgn0016076	5967.12	1.71042	3.27256	4.20065e-07
CG11317	FBgn0039816	4611.28	0.931605	1.9074	0.000537334			CG34227	FBgn0085256	1956.67	1.68753	3.22104	2.08406e-05
CG12605	FBgn0035481	19352.1	0.921522	1.89411	0.000782698			Obp99c	FBgn0039682	8217.91	1.67685	3.19728	1.01991e-07
CG31324	FBgn0051324	1946.03	0.903865	1.87107	0.0415842			CG9928	FBgn0032472	1349.39	1.61625	3.06576	2.08406e-05
Hr38	FBgn0014859	12553.5	0.884608	1.84626	0.00426956			Nplp2	FBgn0040813	16923.8	1.5949	3.02074	3.7883e-09
CG31191	FBgn0051191	9044.03	0.870962	1.82888	0.00467777			Dro	FBgn0010388	3121.08	1.58813	3.0066	7.91023e-05
CG2865	FBgn0023526	5440.45	0.864495	1.8207	0.0156273			IM23	FBgn0034328	719.667	1.54771	2.92353	0.00204241
lolal	FBgn0022238	2741.96	0.842715	1.79342	0.0263343			Spn88Eb	FBgn0038299	653.101	1.51934	2.86659	0.00219446
Ubc6	FBgn0004436	5779.89	0.841761	1.79224	0.0168829			RpS9	FBgn0010408	838.228	1.51631	2.86059	0.000311217
rudhira	FBgn0266019	27128.3	0.836293	1.78546	0.00130769			CG1468	FBgn0030157	2029.08	1.50601	2.84024	0.000579349
Nplp2	FBgn0040813	7539.58	0.836068	1.78518	0.0221942			Eip71CD	FBgn0000565	1167.06	1.50168	2.83172	1.04004e-06
CkIalpha	FBgn0015024	11978.7	0.808345	1.7512	0.0121126			PGRP-SB1	FBgn0043578	523.753	1.48324	2.79576	1.03792e-05
CG11138	FBgn0030400	14084.3	0.806046	1.74841	0.0087351			ppl	FBgn0027945	581.204	1.47795	2.78553	9.62433e-05
Hrb27C	FBgn0004838	37392.7	0.805043	1.7472	0.00113529			alphaSnap	FBgn0250791	1883.15	1.45899	2.74916	0.000524857
p120ctn	FBgn0260799	9368.38	0.804832	1.74694	0.0201015			CG18067	FBgn0034512	10932.4	1.45683	2.74505	1.33804e-06
14-3-3epsilon	FBgn0020238	27546	0.802711	1.74438	0.0021817			Npc2h	FBgn0039801	1754.42	1.36129	2.56915	0.00445106
Pur-alpha	FBgn0022361	10176.8	0.793969	1.73384	0.0197102			Sr-CI	FBgn0014033	459.941	1.35347	2.55527	0.00223363
DopEcR	FBgn0035538	25822.2	0.789781	1.72881	9.38516e-05			RpL36	FBgn0002579	4111.09	1.35237	2.55331	0.00054025
Syngr	FBgn0033876	7919.48	0.781386	1.71878	4.08935e-08			IM33	FBgn0031561	1167.03	1.34278	2.53639	0.00538558
qm	FBgn0019662	5233.78	0.775486	1.71177	0.000576362			Ubc10	FBgn0026316	712.517	1.33964	2.53088	1.15263e-05
CG4612	FBgn0035016	10582.1	0.771406	1.70693	0.0215532			Tig	FBgn0011722	2241.27	1.33537	2.5234	0.00352892
scrt	FBgn0004880	27115.5	0.765396	1.69984	0.00396801			CG8343	FBgn0040502	3844.38	1.33245	2.51831	0.000866472
ctp	FBgn0011760	20956.4	0.755333	1.68802	0.00732656			Rh6	FBgn0019940	3134.99	1.33203	2.51757	0.000375067
His2Av	FBgn0001197	1625.27	0.75426	1.68677	0.00397123			CG16772	FBgn0032835	3580.26	1.31157	2.48211	1.26216e-07
CG4911	FBgn0035959	7873.91	0.751878	1.68398	0.0201015			CG34166	FBgn0085195	6682.4	1.31029	2.47991	0.000164137
Cam	FBgn0000253	70399.9	0.751618	1.68368	0.001067			CG5991	FBgn0026576	1580.48	1.27876	2.42631	1.33804e-06
Nep3	FBgn0031081	4012.77	0.750833	1.68276	0.0211389			CG11211	FBgn0033067	1049.75	1.27853	2.42591	0.00840486
CG14440	FBgn0029894	1908.06	0.750319	1.68216	0.000269338			GNBP-like3	FBgn0034511	815.842	1.26081	2.39631	0.01816
sr	FBgn0003499	5475.42	0.744201	1.67505	0.021441			RpS17	FBgn0005533	2823.16	1.25957	2.39425	0.00102489
Trf2	FBgn0261793	10239	0.737917	1.66777	0.0308402			cype	FBgn0015031	677.21	1.24329	2.36738	0.0176808
HnRNP-K	FBgn0267791	7526.19	0.728887	1.65736	0.0423571			CG9917	FBgn0030740	1632.33	1.24044	2.3627	0.00371947
Mapmodulin	FBgn0034282	4130.88	0.728756	1.65721	0.00674418			CG7299	FBgn0032282	1157.14	1.23675	2.35667	0.0108144
CG5098	FBgn0034300	4702.21	0.724222	1.65201	0.0380603			CG2233	FBgn0029990	6306.75	1.22726	2.34122	0.000629548
Pdp1	FBgn0016694	36966.9	0.720697	1.64798	0.00426956			Pis	FBgn0030670	2180.83	1.22548	2.33833	0.000136702
CG10543	FBgn0034570	7612.03	0.717862	1.64474	0.0209992			CG3088	FBgn0036015	2804.22	1.22022	2.32982	0.00341813
Rab2	FBgn0014009	3856.02	0.712798	1.63898	0.0252639			tim	FBgn0014396	13117.8	1.21127	2.31541	6.28787e-05
CG34401	FBgn0085430	19070.6	0.711495	1.6375	0.00624937			CG33493	FBgn0053493	579.617	1.20424	2.30415	0.00985557
norpA	FBgn0262738	29746.3	0.70546	1.63066	0.00765774			Glt	FBgn0001114	16768.4	1.19499	2.28943	3.64092e-05
CkIIbeta	FBgn0000259	6566	0.698813	1.62317	0.0483128			Gel	FBgn0010225	11406.9	1.18396	2.272	0.000147572
SIFaR	FBgn0038880	1832.01	0.695755	1.61973	0.008953			Obp49a	FBgn0050052	1716.52	1.18363	2.27147	0.000992821
Mnt	FBgn0023215	13802.2	0.690362	1.61369	0.00426956			AttB	FBgn0041581	489.845	1.171	2.25167	0.0356036
CG7708	FBgn0038641	11475	0.683489	1.60602	0.000549768			CG7630	FBgn0040793	2102.27	1.16669	2.24496	0.00376304
His3.3B	FBgn0004828	16567.3	0.683094	1.60558	0.0202062			CG7016	FBgn0039238	485.187	1.14927	2.21801	0.0406095
fne	FBgn0086675	30574.3	0.667289	1.58809	0.0123516			Adi1	FBgn0052068	461.266	1.12264	2.17745	0.0372949
mamo	FBgn0267033	85725.5	0.665324	1.58592	0.000533063			Kaz1-ORFB	FBgn0063923	602.214	1.11352	2.16373	0.0397886
vib	FBgn0262468	5133.21	0.661694	1.58194	0.00312549			TBC1D16	FBgn0032249	1224.26	1.10708	2.1541	0.00620095
Unr	FBgn0263352	19329.3	0.661635	1.58187	0.0132051			Pal2	FBgn0262728	6274.59	1.10235	2.14704	0.000280784
mt:ND1	FBgn0013679	18160.3	0.66025	1.58036	0.0274428			gol	FBgn0004919	12015.6	1.08854	2.12658	0.00054025
mei-P26	FBgn0026206	60100.8	0.653657	1.57315	0.0065353			Gclm	FBgn0046114	717.879	1.06919	2.09825	0.0178124
CG42313	FBgn0259213	19370.9	0.653361	1.57283	0.0268382			Arr1	FBgn0000120	36639.9	1.06513	2.09236	4.12456e-05
Hex-A	FBgn0001186	14391.4	0.652974	1.57241	0.0412973			Gabat	FBgn0036927	1472.48	1.05323	2.07517	0.0125953
CG33181	FBgn0053181	8400.36	0.648604	1.56765	0.0209981			mt:CoIII	FBgn0013676	27973	1.043	2.06051	0.000107474
trv	FBgn0085391	35055.6	0.645413	1.56419	1.2673e-07			Cyt-c1	FBgn0035600	7432.37	1.03106	2.04353	0.00455505
Reph	FBgn0021800	11613.6	0.643473	1.56209	0.0479467			mt:Cyt-b	FBgn0013678	8232.01	1.03051	2.04274	0.00106968
Sh	FBgn0003380	157547	0.639364	1.55764	0.00402613			CG1927	FBgn0027547	1515.35	1.02248	2.0314	0.0436699
Gbeta13F	FBgn0001105	14054.7	0.636754	1.55483	0.0497619			Ser7	FBgn0019929	626.645	1.01302	2.01813	0.015731
Vap33	FBgn0029687	9317.94	0.636385	1.55443	0.0127059			Rh3	FBgn0003249	6719.62	1.00965	2.01343	0.00746783
Eip93F	FBgn0264490	56279.5	0.631142	1.54879	0.00990415			Cyp4d21	FBgn0031925	2112.93	1.00596	2.00828	0.00104191
Spred	FBgn0020767	10069	0.628556	1.54602	0.00287939			per	FBgn0003068	2110.44	1.0042	2.00583	0.0490733
Rbp6	FBgn0260943	77074.5	0.623344	1.54044	0.00841053			jeb	FBgn0086677	21574.3	1.00087	2.00121	1.8731e-06
dsh	FBgn0000499	1335.67	0.620378	1.53728	0.0331078			CG5676	FBgn0032200	522.745	0.997188	1.99611	0.00998345
CG5065	FBgn0034145	34729.6	0.617077	1.53376	0.0201015			Gnmt	FBgn0038074	4120.67	0.995789	1.99417	0.020389
dysc	FBgn0264006	54224.7	0.615146	1.53171	0.00096479			Pdp1	FBgn0016694	60108.1	0.994082	1.99181	6.28787e-05
Pkc98E	FBgn0003093	16346.9	0.61482	1.53137	0.00312549			AlaRS	FBgn0027094	707.885	0.98214	1.97539	0.0208682
Pde9	FBgn0259171	20473.8	0.610805	1.52711	0.0227288			Rop	FBgn0004574	3725.41	0.980819	1.97359	0.00354319
bol	FBgn0011206	39331.1	0.605459	1.52146	0.0201302			l(3)73Ah	FBgn0002283	782.22	0.979764	1.97214	0.0245177
CG32204	FBgn0052204	22408.2	0.604302	1.52024	5.90884e-05			CG14277	FBgn0032008	4368.33	0.975885	1.96685	0.0216218
Syt4	FBgn0028400	14062.5	0.60381	1.51972	3.27665e-08			RpL23	FBgn0010078	4720.47	0.974231	1.96459	0.019479
CG44247	FBgn0265182	22641.2	0.598251	1.51388	0.000556597			ND-B12	FBgn0034645	721.029	0.972925	1.96282	0.00707452
kek1	FBgn0015399	8944.51	0.596263	1.5118	9.80897e-08			CG2145	FBgn0030251	2959.51	0.969261	1.95784	0.0365189
CG14989	FBgn0035495	20580.3	0.594681	1.51014	0.0462188			LeuRS	FBgn0053123	618.331	0.968054	1.9562	0.0239785
Galphaq	FBgn0004435	4406.98	0.594395	1.50984	0.0100651			CG14274	FBgn0032023	1060.84	0.965863	1.95323	0.000141276
Top1	FBgn0004924	6541.48	0.592834	1.50821	0.0476158			mt:CoI	FBgn0013674	41166.5	0.965749	1.95308	0.000190372
g	FBgn0001087	5515.71	0.588131	1.5033	0.00258725			CG17278	FBgn0046763	596.057	0.962063	1.94809	0.0204088
Naa30A	FBgn0024362	1303.2	0.586948	1.50207	0.0253513			Fis1	FBgn0039969	1220.2	0.960167	1.94553	0.0120687
CG8500	FBgn0037754	10827	0.58648	1.50158	0.0151575			eIF2beta	FBgn0004926	644.572	0.959274	1.94433	0.0407697
CG17816	FBgn0037525	43594.9	0.576718	1.49145	1.19443e-07			Rab1	FBgn0016700	1467.55	0.956217	1.94022	0.0175569
nAChRalpha6	FBgn0032151	64335.7	0.575878	1.49058	0.0197102			qkr58E-2	FBgn0022985	1422.73	0.955985	1.9399	0.0254104
nSyb	FBgn0013342	41959	0.568642	1.48313	0.00740442			Lsp1beta	FBgn0002563	7437.61	0.951644	1.93408	0.0106542
AGO1	FBgn0262739	31223.4	0.568565	1.48305	0.0027924			ltl	FBgn0052372	3651.56	0.946679	1.92743	5.75422e-05
hec	FBgn0030437	1302.1	0.560344	1.47462	0.00162867			Cpn	FBgn0261714	3653.31	0.945606	1.926	0.00926491
Topors	FBgn0267351	1235.88	0.559591	1.47385	0.0489672			CG6503	FBgn0040606	10538.1	0.940394	1.91905	0.00602703
Akap200	FBgn0027932	6038.47	0.554819	1.46898	0.0127059			mt:lrRNA	FBgn0013686	88132.1	0.935261	1.91224	0.000120232
CG5830	FBgn0036556	84231.6	0.553562	1.46771	0.0172353			Ggamma1	FBgn0004921	17253.2	0.929487	1.9046	0.00234196
mahe	FBgn0029979	12220.1	0.553113	1.46725	0.0263873			comt	FBgn0000346	4349.53	0.926919	1.90121	0.0191014
14-3-3zeta	FBgn0004907	48112.8	0.552972	1.46711	0.00376066			Rab6	FBgn0015797	1005	0.924525	1.89806	0.0496139
pho	FBgn0002521	4027.14	0.548605	1.46267	0.00419193			Slob	FBgn0264087	29597.5	0.923356	1.89652	0.000797873
Rab8	FBgn0262518	2532.38	0.542368	1.45636	0.0329355			miple1	FBgn0027111	6338.33	0.918412	1.89003	0.000290008
CG42346	FBgn0259677	3789.31	0.536317	1.45027	0.00213208			CG7708	FBgn0038641	5207	0.915406	1.8861	0.00433634
fax	FBgn0014163	13729.3	0.536293	1.45024	0.0423571			Ubc4	FBgn0015321	1354.26	0.906617	1.87464	0.0178124
para	FBgn0264255	137117	0.536033	1.44998	0.0212851			AsnRS	FBgn0086443	475.524	0.905635	1.87337	0.0114562
Rdl	FBgn0004244	100580	0.532784	1.44672	0.0160122			Col4a1	FBgn0000299	3721.15	0.900312	1.86647	0.00412307
spab	FBgn0033358	1357.14	0.532685	1.44662	0.0235199			atk	FBgn0036995	817.757	0.892728	1.85668	0.0250642
klg	FBgn0017590	15480.7	0.530163	1.44409	0.0121126			CG8289	FBgn0030854	726.56	0.87753	1.83723	0.0194801
sqd	FBgn0263396	24837.3	0.526919	1.44085	0.0135405			ninaC	FBgn0002938	35514.3	0.873471	1.83207	0.00133191
toy	FBgn0019650	31899.7	0.526039	1.43997	2.35647e-08			14-3-3epsilon	FBgn0020238	25251.9	0.872227	1.83049	7.18861e-05
nmo	FBgn0011817	15923	0.522268	1.43621	0.033861			mt:srRNA	FBgn0013688	9946.22	0.866433	1.82315	0.0143443
CG8405	FBgn0034071	4472.34	0.51959	1.43355	0.0198138			Ric	FBgn0265605	3689.39	0.86632	1.82301	0.0372949
CG42324	FBgn0259224	15339.4	0.519546	1.4335	0.0156273			CG44247	FBgn0265182	12803.3	0.857635	1.81207	0.000243089
nrv3	FBgn0032946	57785	0.516993	1.43097	0.0264183			CG15021	FBgn0035544	1994.4	0.855867	1.80985	0.0329167
Syt1	FBgn0004242	63068.1	0.512582	1.4266	0.02904			mod	FBgn0002780	636.359	0.854681	1.80836	0.00453767
CHES-1-like	FBgn0029504	8781.98	0.512321	1.42634	0.0219875			CG17108	FBgn0032285	21274.7	0.853707	1.80714	0.00449322
bru3	FBgn0264001	86958.1	0.509791	1.42384	7.89368e-05			REG	FBgn0029133	892.567	0.85243	1.80554	0.0356036
CG6765	FBgn0035903	3341.98	0.505812	1.41992	0.00151486			CG9636	FBgn0037556	1710.69	0.846922	1.79866	0.00905084
nAChRbeta1	FBgn0000038	35290.3	0.504843	1.41897	0.0381931			Idgf4	FBgn0026415	5455.54	0.846648	1.79832	0.0457475
CG12054	FBgn0039831	8719.6	0.502646	1.41681	0.00426956			AP-2mu	FBgn0263351	1136.49	0.844599	1.79577	0.0389744
ssx	FBgn0024987	7090.09	0.501677	1.41586	0.00142564			CG14989	FBgn0035495	23877.2	0.844569	1.79573	1.26216e-07
dl	FBgn0260632	6575.31	0.499299	1.41353	0.0198138			Vmat	FBgn0260964	11070.7	0.83937	1.78927	5.43518e-08
Cngl	FBgn0263257	59236.5	0.496202	1.41049	0.00402613			CR31451	FBgn0051451	41197.3	0.832448	1.7807	0.00219446
fru	FBgn0004652	47947.8	0.495886	1.41019	0.0202453			ATP7	FBgn0030343	2097.12	0.83	1.77769	0.0312742
Sema1a	FBgn0011259	39867.6	0.493492	1.40785	1.67694e-06			Pc	FBgn0003042	1289.87	0.82969	1.7773	0.0153867
jim	FBgn0027339	60311	0.491927	1.40632	0.036818			RSG7	FBgn0024941	4206.35	0.825416	1.77205	0.0161473
CG2186	FBgn0030243	7904.19	0.490644	1.40507	0.00903564			His3.3B	FBgn0004828	14902.1	0.82107	1.76672	0.0118367
Ace	FBgn0000024	16985.2	0.483081	1.39773	0.0340703			Vps4	FBgn0027605	1104.64	0.81932	1.76457	0.028055
east	FBgn0261954	16863.1	0.482526	1.39719	0.0376774			CG9813	FBgn0038143	15977.4	0.818814	1.76396	0.00346092
ome	FBgn0259175	8238.92	0.479333	1.3941	0.0153684			Rab2	FBgn0014009	3144.45	0.817921	1.76286	0.0200956
dati	FBgn0262636	13137.2	0.477169	1.39201	0.00239133			Ssrp	FBgn0010278	425.779	0.813756	1.75778	0.0465827
pros	FBgn0004595	157342	0.475649	1.39054	0.0405918			nSyb	FBgn0013342	37998.8	0.812021	1.75567	0.00341813
eIF4EHP	FBgn0053100	18798	0.474323	1.38927	0.008953			Pu	FBgn0003162	2694.71	0.810597	1.75394	0.00775658
dtn	FBgn0262730	19285.6	0.471882	1.38692	0.0026544			Apoltp	FBgn0032136	17518.7	0.809703	1.75285	0.0106542
CtBP	FBgn0020496	13397.1	0.471325	1.38638	0.00323648			chp	FBgn0267435	19392.2	0.808989	1.75198	0.00944103
CG45049	FBgn0266409	4169.26	0.471162	1.38623	0.0200922			LanB1	FBgn0261800	1101.15	0.791363	1.73071	0.000490533
CanA-14F	FBgn0030758	23188.7	0.471138	1.3862	0.0219294			CG11388	FBgn0034959	793.969	0.786749	1.72518	0.0082236
Bsg	FBgn0261822	36818.6	0.47107	1.38614	0.0122992			Hydr2	FBgn0014906	1688.64	0.781767	1.71924	0.0018221
brat	FBgn0010300	16932.2	0.470231	1.38533	1.12878e-07			teq	FBgn0023479	14843.2	0.778263	1.71506	0.00214442
lola	FBgn0005630	66913.8	0.467666	1.38287	0.0312695			Sec22	FBgn0260855	1212.01	0.769773	1.705	0.0309582
Ggamma30A	FBgn0267252	78831.8	0.465005	1.38032	0.0204339			GlcT-1	FBgn0067102	825.347	0.768874	1.70394	0.0112041
glec	FBgn0015229	3437.26	0.464589	1.37992	0.00157505			vkg	FBgn0016075	2596.91	0.765116	1.69951	0.0270288
shep	FBgn0052423	69888	0.463577	1.37896	0.00434833			Jabba	FBgn0259682	2053.5	0.760774	1.6944	0.0347904
robo1	FBgn0005631	7067.73	0.463293	1.37869	0.00279372			Inos	FBgn0025885	3141.51	0.757193	1.6902	0.0291792
CG3198	FBgn0029887	5665.75	0.46188	1.37734	0.0285454			CG4577	FBgn0031306	11197.7	0.757073	1.69006	2.81626e-09
porin	FBgn0004363	7446.29	0.461025	1.37652	0.0299004			cv-d	FBgn0265048	2334.32	0.742558	1.67314	0.0191014
Jarid2	FBgn0036004	8252.37	0.460284	1.37581	0.00522839			jef	FBgn0033958	9483.08	0.741833	1.6723	1.41977e-05
unk	FBgn0004395	4227.88	0.45922	1.3748	0.0309138			CG14767	FBgn0040777	5879.81	0.739028	1.66905	0.0189322
CG3061	FBgn0038195	2262.32	0.458266	1.37389	0.00567229			Nmdmc	FBgn0010222	855.17	0.738697	1.66867	0.0392468
mub	FBgn0262737	221127	0.457912	1.37355	8.09125e-10			CG6656	FBgn0038912	771.018	0.731934	1.66086	0.000361161
Tlk	FBgn0086899	22709.5	0.449156	1.36524	0.033678			ninaE	FBgn0002940	202843	0.730298	1.65898	0.00354319
heph	FBgn0011224	42861.5	0.446727	1.36294	0.00785781			ITP	FBgn0035023	1893.5	0.72983	1.65844	0.00307441
Sap47	FBgn0013334	40481.9	0.437053	1.35384	0.00594928			scrt	FBgn0004880	27107.7	0.725679	1.65368	0.011928
Set1	FBgn0040022	7248.81	0.434675	1.35161	0.0297276			jdp	FBgn0027654	7819.9	0.719825	1.64698	0.000749805
Pp2C1	FBgn0022768	5643.97	0.434216	1.35118	0.0308402			Irc	FBgn0038465	1910.73	0.710654	1.63655	0.0371452
nAChRalpha1	FBgn0000036	25754.5	0.433863	1.35085	2.22972e-09			Reph	FBgn0021800	9324.86	0.699559	1.62401	0.0381522
Flo2	FBgn0264078	5461.4	0.432904	1.34995	0.00748497			Act5C	FBgn0000042	13639.9	0.698526	1.62285	0.0490733
Corin	FBgn0033192	10903.4	0.432822	1.34987	0.0119277			VhaM8.9	FBgn0037671	2468.86	0.69484	1.6187	0.011691
sgg	FBgn0003371	28923.6	0.431987	1.34909	0.0120207			qm	FBgn0019662	2688.61	0.688245	1.61132	0.000164137
nej	FBgn0261617	26501.6	0.427525	1.34492	0.00402613			alpha-Est8	FBgn0015576	2344.52	0.688198	1.61127	1.10988e-07
Pka-R2	FBgn0022382	51126.1	0.4268	1.34425	7.89368e-05			Cam	FBgn0000253	94070.9	0.682068	1.60444	0.0104308
Rim	FBgn0053547	91498.6	0.425077	1.34264	0.000638295			EndoB	FBgn0034433	1959.25	0.662521	1.58285	0.0465827
PlexA	FBgn0025741	21794.8	0.417605	1.33571	0.0126569			CG3812	FBgn0030421	1680.02	0.65957	1.57961	0.021323
Ih	FBgn0263397	28379.3	0.414839	1.33315	0.0358125			PRL-1	FBgn0024734	13733.2	0.652981	1.57241	0.0209452
CG11319	FBgn0031835	35474.2	0.412324	1.33083	0.0354391			CG12025	FBgn0035285	2448.55	0.648841	1.56791	0.00266663
Sytalpha	FBgn0261089	12098.1	0.411326	1.32991	0.00326952			santa-maria	FBgn0025697	1624.52	0.646304	1.56515	0.01816
l(3)neo38	FBgn0265276	9395.87	0.410808	1.32943	0.0443425			Lamp1	FBgn0032949	6686.82	0.63183	1.54953	0.0314497
dikar	FBgn0261934	17390.9	0.408143	1.32698	0.0127059			IA-2	FBgn0031294	177421	0.630108	1.54768	0.0163759
cpx	FBgn0041605	115099	0.407881	1.32674	4.988e-05			EndoA	FBgn0038659	9148.6	0.62454	1.54172	3.86066e-08
sNPF	FBgn0032840	23155.4	0.406029	1.32503	0.00114332			Cpr65Au	FBgn0042119	4372.21	0.622883	1.53995	0.00453767
Cow	FBgn0039054	34910.7	0.404299	1.32345	0.00434833			Ppn	FBgn0003137	6837.38	0.610456	1.52674	0.0018221
brp	FBgn0259246	99582.6	0.403051	1.3223	2.63905e-05			Tsp97E	FBgn0039465	6806.82	0.606492	1.52255	0.00020827
cac	FBgn0263111	68909.5	0.402397	1.3217	0.0156273			CG7781	FBgn0032021	4320.07	0.604349	1.52029	0.00904869
stau	FBgn0003520	9605.57	0.40171	1.32107	0.0299004			CG4747	FBgn0043456	2132.88	0.590152	1.5054	0.021461
PIP4K	FBgn0039924	4459.61	0.397825	1.31752	0.0021817			GATAd	FBgn0032223	2401.71	0.589912	1.50515	0.0112053
GATAd	FBgn0032223	2907.11	0.395903	1.31577	0.0235199			sNPF	FBgn0032840	6670.4	0.559876	1.47414	0.00944103
Ca-beta	FBgn0259822	21738.5	0.39189	1.31211	8.95539e-06			Toll-7	FBgn0034476	2914.97	0.545015	1.45904	0.0104308
Rbp	FBgn0262483	43322.5	0.391146	1.31143	0.000149121			sinu	FBgn0010894	565.211	0.530725	1.44466	0.0294914
Cadps	FBgn0053653	33207	0.390511	1.31086	0.0243711			CG11138	FBgn0030400	11198.7	0.528303	1.44223	0.01816
Mid1	FBgn0053988	19374.3	0.390381	1.31074	0.00879524			Toll-6	FBgn0036494	3531.4	0.527817	1.44175	0.000168184
dlg1	FBgn0001624	27948.4	0.389802	1.31021	0.0422699			norpA	FBgn0262738	76668	0.527773	1.4417	0.00300886
Oamb	FBgn0024944	11445.9	0.389492	1.30993	0.0121126			CG4911	FBgn0035959	6741.49	0.519437	1.4334	0.0387822
CG4080	FBgn0035983	2358.5	-0.390353	0.762943	0.0212851			dtn	FBgn0262730	15088.5	0.510869	1.42491	0.0130464
Eip74EF	FBgn0000567	6637.08	-0.394415	0.760798	0.0248398			svr	FBgn0004648	8000.36	0.504422	1.41856	0.00564573
Nc73EF	FBgn0010352	21170.4	-0.425732	0.744461	0.033678			Galphao	FBgn0001122	17333.7	0.497921	1.41218	0.0231546
Svil	FBgn0266696	24641.9	-0.426605	0.744011	0.00130769			CG5758	FBgn0032666	8105.26	0.482279	1.39695	0.0246817
hyd	FBgn0002431	8014.47	-0.426964	0.743826	0.0483128			Mapmodulin	FBgn0034282	4221.72	0.47466	1.38959	0.0356036
CG3764	FBgn0036684	3737.5	-0.440202	0.737031	0.0339251			fwe	FBgn0261722	4783.85	0.459038	1.37462	0.0106542
Lpin	FBgn0263593	7288.16	-0.442916	0.735646	0.00969513			Hrb27C	FBgn0004838	29580.9	0.450209	1.36624	0.0183174
CG42663	FBgn0261545	1912.83	-0.449605	0.732243	0.000656438			faf	FBgn0005632	15738	-0.392098	0.76202	8.05582e-05
lqf	FBgn0028582	7201.75	-0.451067	0.731502	0.0424358			Smr	FBgn0265523	21816.7	-0.399064	0.75835	0.000134034
CG33143	FBgn0053143	2018.6	-0.457401	0.728297	0.0470327			gw	FBgn0051992	21210.2	-0.411394	0.751896	0.0116623
CG34376	FBgn0085405	2442.49	-0.472034	0.720947	0.000537334			eIF5B	FBgn0026259	6832.4	-0.413256	0.750927	0.0298794
CG8740	FBgn0027585	4540.69	-0.47533	0.719302	4.26131e-05			hdc	FBgn0010113	23639	-0.422679	0.746038	0.0490733
Karybeta3	FBgn0087013	4278.89	-0.475354	0.71929	0.0422699			Asx	FBgn0261823	5061.88	-0.423459	0.745635	0.0239785
Sik3	FBgn0262103	3709.22	-0.481527	0.716219	0.0408896			CG42389	FBgn0259735	31958.3	-0.432482	0.740986	0.0451981
Hsp83	FBgn0001233	10089.3	-0.490957	0.711553	0.0121126			par-1	FBgn0260934	36573.1	-0.442641	0.735787	6.0828e-05
ASPP	FBgn0034606	4193.83	-0.495991	0.709074	4.78723e-05			Ect4	FBgn0262579	17767.9	-0.45038	0.73185	0.00765053
Chchd2	FBgn0260747	2188.83	-0.500734	0.706747	0.0198138			CG42668	FBgn0261550	6003.1	-0.453744	0.730146	1.96643e-06
Msr-110	FBgn0015766	17826.5	-0.502061	0.706097	0.00137658			mrj	FBgn0034091	4361.38	-0.457577	0.728208	0.000490533
Oatp30B	FBgn0032123	4204.17	-0.505319	0.704505	0.0202549			lqf	FBgn0028582	15065.9	-0.459707	0.727134	0.00599357
zormin	FBgn0052311	14284.8	-0.506031	0.704157	0.0122992			Tm1	FBgn0003721	12973.8	-0.460044	0.726964	0.0387822
RpL18	FBgn0035753	2074.43	-0.508574	0.702917	0.00720437			CG31522	FBgn0051522	8892.76	-0.469996	0.721967	0.0143021
sls	FBgn0086906	123935	-0.510673	0.701895	0.0308402			Aldh-III	FBgn0010548	3557.25	-0.481973	0.715998	0.010043
Gp150	FBgn0013272	9061.24	-0.513081	0.700724	0.00239133			Itp-r83A	FBgn0010051	6171.6	-0.487733	0.713145	0.0452516
dop	FBgn0267390	6220.39	-0.518891	0.697908	0.0265758			form3	FBgn0053556	4501.37	-0.487767	0.713128	0.00150919
kst	FBgn0004167	14383.7	-0.524374	0.695261	0.000994797			cdc14	FBgn0031952	3842.99	-0.505182	0.704571	0.0436699
CG30460	FBgn0050460	3391.88	-0.526095	0.694432	0.0259492			mgl	FBgn0261260	36503.8	-0.5093	0.702563	0.00345976
CG7518	FBgn0038108	5050.52	-0.541195	0.687201	0.00863281			CG9776	FBgn0027866	3592.42	-0.519779	0.697479	0.001272
nrv1	FBgn0015776	2867.44	-0.552175	0.681991	0.0457606			NKAIN	FBgn0085442	6155.27	-0.522591	0.69612	0.0156631
yata	FBgn0260990	2098.24	-0.553215	0.6815	0.00735616			Pura	FBgn0035802	4426.65	-0.525249	0.694839	0.021323
CG1640	FBgn0030478	3927.45	-0.557174	0.679632	0.00161491			CG41378	FBgn0085638	27956.2	-0.528316	0.693363	0.0383726
ogre	FBgn0004646	1657.35	-0.562433	0.677159	0.0244719			CG8184	FBgn0030674	11864.7	-0.5324	0.691403	0.012436
form3	FBgn0053556	5199.03	-0.56752	0.674776	0.0192931			CG11665	FBgn0033028	2193.33	-0.536535	0.689425	0.0176982
Esyt2	FBgn0266758	2503.19	-0.581252	0.668383	0.00494021			Tis11	FBgn0011837	8144.51	-0.541599	0.687009	0.0397403
SP1173	FBgn0035710	3240.58	-0.599877	0.65981	0.0137375			CG34126	FBgn0083962	5691.77	-0.548073	0.683933	0.000245914
Hnf4	FBgn0004914	3238.56	-0.600867	0.659357	0.00879524			cindr	FBgn0027598	8669.79	-0.54998	0.68303	0.0406095
wat	FBgn0039620	13267.1	-0.624566	0.648615	0.0215532			whd	FBgn0261862	3122.24	-0.550328	0.682865	0.0256902
Non1	FBgn0028473	3471.91	-0.640878	0.641323	0.0376774			puf	FBgn0039214	6359.28	-0.553593	0.681321	0.0143443
Sec24CD	FBgn0262126	2252.23	-0.643675	0.64008	0.0373551			bab2	FBgn0025525	7302.33	-0.55701	0.67971	0.0334949
skap	FBgn0037643	3842.2	-0.652637	0.636116	0.0231201			CG2841	FBgn0003159	3838.32	-0.569238	0.673973	0.00018226
Hsp70Bb	FBgn0013278	6879.45	-0.653361	0.635797	0.045795			mew	FBgn0004456	4413.36	-0.570053	0.673592	0.0471033
CG3902	FBgn0036824	3324.65	-0.654215	0.635421	0.00196788			Egfr	FBgn0003731	11077.1	-0.575585	0.671014	0.000866472
Mhc	FBgn0264695	52201	-0.65657	0.634385	0.00735616			CG1646	FBgn0039600	5387.76	-0.577018	0.670348	0.0226181
mew	FBgn0004456	3360.39	-0.660041	0.632861	0.0344397			CG30015	FBgn0050015	8902.63	-0.577627	0.670065	0.00799111
foxo	FBgn0038197	5264.94	-0.67193	0.627667	0.00562234			RhoBTB	FBgn0036980	2258.46	-0.582329	0.667885	0.0348685
CG34120	FBgn0083956	6591.42	-0.677919	0.625066	8.29012e-07			Mrtf	FBgn0052296	7168.56	-0.583192	0.667486	0.00219503
Tsp42Ee	FBgn0029506	2206.32	-0.678783	0.624692	0.000115088			CG17684	FBgn0263780	105658	-0.587896	0.665313	0.0345312
Desat1	FBgn0086687	20303.3	-0.684591	0.622182	0.0188713			mld	FBgn0263490	9705.87	-0.590882	0.663937	0.00937003
eEF1alpha1	FBgn0000556	37069	-0.685303	0.621875	0.00735616			jumu	FBgn0015396	856.021	-0.592586	0.663153	0.0287755
Gpo-1	FBgn0022160	3142.81	-0.687231	0.621045	0.00586469			CG43367	FBgn0263110	5675.11	-0.592864	0.663026	0.00944103
AcCoAS	FBgn0012034	13311.3	-0.695215	0.617617	4.64716e-07			p130CAS	FBgn0035101	3335.48	-0.594904	0.662089	2.6242e-05
RpL32	FBgn0002626	1677.74	-0.699764	0.615673	0.0172874			CG31999	FBgn0051999	3061.92	-0.596008	0.661582	0.04592
Strn-Mlck	FBgn0265045	12495.2	-0.703759	0.613971	0.0308402			tweek	FBgn0261671	15778	-0.596523	0.661346	0.0106897
Vha26	FBgn0015324	7001.63	-0.706616	0.612756	0.0293771			vap	FBgn0003969	1242.42	-0.598477	0.660451	0.0104308
Acon	FBgn0010100	11669.9	-0.708977	0.611754	0.0329355			scrib	FBgn0263289	35464.1	-0.603792	0.658022	0.0494016
eEF5	FBgn0034967	1654.48	-0.717024	0.608351	0.0424358			CG7518	FBgn0038108	3750.59	-0.607117	0.656508	0.01076
CG14995	FBgn0035497	4515.28	-0.717115	0.608313	0.0263343			Cirl	FBgn0033313	21435.3	-0.608849	0.65572	0.0365189
pk	FBgn0003090	1563.43	-0.723247	0.605732	0.0248381			pk	FBgn0003090	2327.04	-0.61489	0.65298	0.00904869
fus	FBgn0023441	5894.31	-0.730665	0.602626	0.000477963			CG4080	FBgn0035983	2176.88	-0.620528	0.650433	0.0345312
eEF2	FBgn0000559	21255.5	-0.745957	0.596272	0.00795843			CG8312	FBgn0037720	8095.4	-0.622173	0.649692	0.0219609
by	FBgn0000244	1576.07	-0.747772	0.595523	1.21681e-06			mbl	FBgn0265487	84166.9	-0.622397	0.649591	0.0235693
ade5	FBgn0020513	1792.68	-0.74838	0.595272	3.95049e-05			axo	FBgn0262870	5277.97	-0.622703	0.649453	0.00511825
Amph	FBgn0027356	5686.44	-0.75234	0.59364	0.0121126			sima	FBgn0266411	40360.5	-0.634395	0.644211	5.75422e-05
CG7920	FBgn0039737	5363.87	-0.754626	0.5927	0.000165833			aralar1	FBgn0028646	3302.14	-0.637057	0.643023	0.0108144
Aldh-III	FBgn0010548	3237.86	-0.75657	0.591902	0.00130769			CG1316	FBgn0035526	4426.76	-0.640416	0.641528	0.000121651
Mipp1	FBgn0026061	1618.18	-0.768295	0.587111	4.74342e-06			CG14431	FBgn0029922	5748.56	-0.653957	0.635535	0.04592
ClC-a	FBgn0051116	2102.03	-0.770098	0.586378	0.045795			Msp300	FBgn0261836	240159	-0.657651	0.63391	4.12456e-05
alphaTub84B	FBgn0003884	7993.32	-0.773899	0.584835	0.0339251			CG34114	FBgn0083950	23769.3	-0.65884	0.633387	1.62602e-05
ATPsynbeta	FBgn0010217	7554.33	-0.775844	0.584047	0.036818			shot	FBgn0013733	87670.9	-0.662143	0.631939	6.49352e-05
ACC	FBgn0033246	21056.7	-0.777282	0.583465	0.00039344			CG10737	FBgn0034420	6001.54	-0.664408	0.630948	0.00473658
ND-51	FBgn0031771	2437.62	-0.778607	0.582929	0.0253745			Sec31	FBgn0033339	3271.13	-0.664447	0.630931	0.0300791
Eno	FBgn0000579	8922.54	-0.784897	0.580394	0.00434833			Dyb	FBgn0033739	5376.84	-0.665366	0.630529	0.0156623
Mdh1	FBgn0262782	1946.74	-0.799675	0.574479	0.0327591			app	FBgn0260941	23054.5	-0.669994	0.628509	0.0365189
Hsc70-4	FBgn0266599	19159.9	-0.804443	0.572583	0.00434833			Amph	FBgn0027356	7162.13	-0.670391	0.628336	0.0208201
CG5273	FBgn0040382	5566.01	-0.808684	0.570902	0.0466627			jvl	FBgn0263929	14170	-0.678134	0.624973	0.00697759
ALiX	FBgn0086346	1649.74	-0.80985	0.570441	0.0179343			Gug	FBgn0010825	16382.2	-0.68258	0.62305	0.000469962
Tep4	FBgn0041180	5406.16	-0.825111	0.564439	0.0150919			Samuel	FBgn0032330	4902.86	-0.688559	0.620473	0.0372949
RpL7A	FBgn0014026	3204.28	-0.829333	0.56279	0.00594455			ds	FBgn0000497	2292.21	-0.695374	0.617549	0.00352892
VhaAC45	FBgn0262515	3395.82	-0.835925	0.560224	0.0407341			Pcf11	FBgn0264962	8388.45	-0.697417	0.616675	0.00252278
SREBP	FBgn0261283	5151.35	-0.836625	0.559952	0.024696			dpy	FBgn0053196	62021.8	-0.698819	0.616076	0.0105981
RpL11	FBgn0013325	1462.1	-0.840154	0.558584	0.0305218			Dbp80	FBgn0024804	27770.5	-0.699584	0.61575	0.0208316
vir-1	FBgn0043841	5950.15	-0.841891	0.557912	0.00213208			dpr21	FBgn0260995	44630.3	-0.699726	0.615689	0.0130464
RpL27	FBgn0039359	2179.93	-0.844049	0.557078	0.0116119			Lmpt	FBgn0261565	12610.1	-0.708681	0.611879	0.0348685
CG34408	FBgn0085437	3312.57	-0.844381	0.55695	0.0188716			Svil	FBgn0266696	34315.7	-0.720539	0.606871	7.2055e-05
ATPCL	FBgn0020236	10224.7	-0.848506	0.555359	0.00265838			foxo	FBgn0038197	8131.74	-0.721381	0.606517	0.0372949
Gmap	FBgn0027287	2979.92	-0.852608	0.553783	3.66564e-15			RhoGEF2	FBgn0023172	5526.26	-0.727464	0.603965	0.00427053
CG17549	FBgn0032774	2761.12	-0.853368	0.553491	0.00145184			CG7971	FBgn0035253	37376.4	-0.730446	0.602717	0.0106542
ATPsyngamma	FBgn0020235	1880.97	-0.854829	0.552931	0.00426931			Wdr62	FBgn0031374	22200.2	-0.731901	0.60211	0.018724
Cp1	FBgn0013770	2379.41	-0.859083	0.551303	0.00594455			CG30463	FBgn0050463	7537.36	-0.738252	0.599465	0.0195914
sev	FBgn0003366	2324.76	-0.860212	0.550872	0.00426956			fus	FBgn0023441	9622.15	-0.748892	0.59506	0.0120687
Alas	FBgn0020764	1766.13	-0.870436	0.546981	0.0202549			ACC	FBgn0033246	30462.5	-0.754549	0.592732	0.010043
FASN1	FBgn0027571	43315.7	-0.873981	0.545639	3.98935e-08			CG8740	FBgn0027585	4661.8	-0.756712	0.591843	0.019874
CG6910	FBgn0036262	2735.22	-0.879642	0.543502	0.00416673			bab1	FBgn0004870	6863.76	-0.758478	0.59112	0.0144194
ref(2)P	FBgn0003231	3494.63	-0.904745	0.534127	0.0475348			Zasp52	FBgn0265991	11450.7	-0.759064	0.59088	0.0348685
Men	FBgn0002719	7255.65	-0.90477	0.534118	0.0035667			fry	FBgn0016081	9599.74	-0.762224	0.589587	2.15704e-05
CG17896	FBgn0023537	1529.9	-0.908784	0.532634	0.0315887			Tie	FBgn0014073	2385.58	-0.76781	0.587308	0.0104308
twin	FBgn0011725	2913.92	-0.913427	0.530922	0.0351014			su(w[a])	FBgn0003638	15807.1	-0.777878	0.583224	0.00473658
fry	FBgn0016081	8248.93	-0.915801	0.53005	0.00196788			blot	FBgn0027660	2048.98	-0.784869	0.580405	0.0104308
Idh	FBgn0001248	4440.64	-0.924063	0.527023	5.84899e-05			CG7720	FBgn0038652	8781.48	-0.788694	0.578868	0.0378244
AOX1	FBgn0267408	2600.95	-0.979986	0.506985	0.0215532			Invadolysin	FBgn0086359	2533.61	-0.789256	0.578643	0.0442953
Gapdh1	FBgn0001091	3980.59	-0.987005	0.504524	0.000269338			let-7-C	FBgn0263049	5778.68	-0.798534	0.574933	0.0372949
alpha-Est7	FBgn0015575	1662.31	-0.988148	0.504125	0.0349297			Pitslre	FBgn0016696	13250.2	-0.805858	0.572022	0.0130809
CG17646	FBgn0264494	2939.08	-0.99232	0.502669	0.0308402			Shroom	FBgn0085408	7858.95	-0.806289	0.571851	0.0378244
blw	FBgn0011211	9968.29	-0.995107	0.501699	0.0021817			cv-c	FBgn0086901	12921.1	-0.80647	0.571779	0.00218374
CG2765	FBgn0035087	4283.36	-0.996547	0.501198	0.0157146			Ythdc1	FBgn0027616	7009.16	-0.81655	0.567798	0.0237769
RpS7	FBgn0039757	3180.93	-0.999487	0.500178	0.010099			RhoGAP18B	FBgn0261461	5026.33	-0.824688	0.564604	0.00252278
eEF1gamma	FBgn0029176	4725.55	-0.999631	0.500128	0.0122089			CG45782	FBgn0267429	82662	-0.834314	0.56085	0.000903182
GstE12	FBgn0027590	1256.94	-1.00286	0.499011	0.0198138			PNUTS	FBgn0053526	6522.41	-0.836585	0.559967	0.0294042
CG9812	FBgn0034860	1772.35	-1.0067	0.497683	0.0299004			MRP	FBgn0032456	9645.02	-0.841052	0.558236	0.00620095
Arc1	FBgn0033926	4204.11	-1.03454	0.488171	3.03962e-06			DCX-EMAP	FBgn0259099	4400.4	-0.841777	0.557956	0.00341813
RpS23	FBgn0033912	2528.64	-1.04148	0.48583	0.0302806			KCNQ	FBgn0033494	8439.47	-0.842849	0.557541	0.00926643
CG31872	FBgn0051872	1379.16	-1.15615	0.448707	0.0293771			CG43693	FBgn0263776	1330.13	-0.851389	0.554251	0.00620095
Sodh-1	FBgn0024289	2034.97	-1.16052	0.447351	0.0198138			bbg	FBgn0087007	8886.13	-0.856229	0.552395	6.49352e-05
LpR1	FBgn0066101	2979.29	-1.17432	0.443092	1.85638e-06			LpR1	FBgn0066101	6143.16	-0.86041	0.550796	0.0209505
Tsf1	FBgn0022355	13939.5	-1.18697	0.439224	2.34388e-05			CG8929	FBgn0034504	3991.57	-0.862781	0.549891	0.0104308
FASN3	FBgn0040001	1350.57	-1.19224	0.437622	0.024109			B52	FBgn0004587	9640.81	-0.874099	0.545595	1.12095e-06
CG32444	FBgn0043783	1430.52	-1.19289	0.437425	0.0198138			sls	FBgn0086906	67803.6	-0.881107	0.542951	0.000469962
RpL40	FBgn0003941	1982.98	-1.24546	0.421773	0.0113469			Indy	FBgn0036816	2429.91	-0.881974	0.542624	0.00775358
Cat	FBgn0000261	3432.3	-1.26154	0.417099	0.00309783			CG12163	FBgn0260462	5828.2	-0.882087	0.542582	0.00937003
tobi	FBgn0261575	2317.41	-1.33053	0.397621	0.00426956			Su(var)3-3	FBgn0260397	16302.3	-0.890942	0.539262	0.00449322
bmm	FBgn0036449	2967.83	-1.46337	0.362645	0.000638295			CG14995	FBgn0035497	5162.31	-0.894074	0.538093	0.0344563
Cpr	FBgn0015623	4441.54	-1.57424	0.33582	1.97543e-05			CG13954	FBgn0033405	4511.17	-0.901875	0.535191	0.0383726
Tps1	FBgn0027560	3297.58	-1.67669	0.3128	9.07839e-08			bmm	FBgn0036449	4340.47	-0.907115	0.53325	0.0055974
CG45080	FBgn0266455	1510.32	-1.87448	0.272726	6.00496e-05			CG42724	FBgn0261641	7503.21	-0.912266	0.53135	0.0023734
Ebp	FBgn0004181	2435.6	-2.23496	0.212427	3.98935e-08			prage	FBgn0261548	3890.39	-0.928861	0.525273	0.0165634
CG17097	FBgn0265264	2059.52	-2.27415	0.206734	6.31508e-08			CG4928	FBgn0027556	7522.52	-0.934414	0.523255	0.0120626
lcs	FBgn0028583	3349.83	-2.5269	0.173511	5.14185e-12			CG17646	FBgn0264494	4751.39	-0.947593	0.518497	0.0239785
FASN2	FBgn0042627	2121.17	-2.66448	0.157729	5.33877e-11			CG17018	FBgn0039972	1016.92	-0.95208	0.516887	0.0371876
whe	FBgn0031176	1136.22	-3.84556	0.0695617	1.54906e-19			CR42862	FBgn0262109	132179	-0.959274	0.514316	5.64968e-05
CG16826	FBgn0032505	15462.2	-6.36291	0.0121499	7.87765e-164			CG34408	FBgn0085437	3554.21	-0.964652	0.512402	0.0272831
								CG2765	FBgn0035087	4613.56	-0.992021	0.502773	0.0176808
								gt	FBgn0001150	673.553	-1.00561	0.498058	0.0397886
								GEFmeso	FBgn0050115	4255.51	-1.01207	0.495836	0.000212771
								klu	FBgn0013469	2541.14	-1.01736	0.494019	0.00620095
								CG4294	FBgn0034742	5082.23	-1.03054	0.489526	4.12456e-05
								Cpr76Bc	FBgn0036880	778.765	-1.04932	0.483195	0.000670208
								CG9902	FBgn0030757	1087.1	-1.06401	0.478301	0.000954803
								tobi	FBgn0261575	5219.52	-1.07156	0.475804	0.00701911
								FASN3	FBgn0040001	3494.45	-1.08235	0.472258	0.0130464
								Clk	FBgn0023076	5087.29	-1.14629	0.451785	0.00341813
								bru2	FBgn0262475	6325.62	-1.1649	0.445996	0.000322603
								IP3K2	FBgn0266375	4491.13	-1.31116	0.402998	4.63813e-14
								CG9016	FBgn0031751	763.478	-1.3132	0.402426	0.0134965
								CG13164	FBgn0061197	732.467	-1.31942	0.400695	0.0130464
								CG4666	FBgn0029838	608.376	-1.32777	0.398384	0.0125953
								Spn77Bb	FBgn0036969	580.128	-1.33104	0.39748	0.0122633
								CG32436	FBgn0052436	517.565	-1.33844	0.395449	0.0114562
								Achl	FBgn0033936	1357.62	-1.34998	0.392297	0.00711591
								CG30438	FBgn0050438	1824.12	-1.35106	0.392003	0.00449586
								CG2839	FBgn0031273	996.171	-1.68075	0.311919	0.000526353

## Sheet: 24h-AR vs naive
MB- 24h-AR vs naive. Mean gene count >50. FDR <0.05									WH- 24h-AR vs naïve. Mean gene count >50. FDR <0.05
Gene Name	Flybase ID	baseMean	Log2 Fold Change	Fold Difference	FDR Q Value				Gene Name	Flybase ID	baseMean	Log2 Fold Change	Fold Difference	FDR Q Value
CG7456	FBgn0032258	330.239	0.829689	1.7773	0.0206265				Yp3	FBgn0004047	7992.6	1.60886	3.0501	7.58824e-07
CG33120	FBgn0053120	155.806	0.782661	1.7203	0.000426919				CG34227	FBgn0085256	1956.67	1.31926	2.49539	0.0111342
c(3)G	FBgn0000246	116.406	0.531638	1.44557	0.000389112				IM4	FBgn0040653	2356.52	1.24629	2.3723	0.00357907
mRpL28	FBgn0031660	286.991	0.233637	1.1758	0.0479106				vri	FBgn0016076	5967.12	1.13825	2.20114	0.0111342
Mhc	FBgn0264695	52201	-0.794012	0.576738	0.0305165				IM3	FBgn0040736	5087.07	1.09506	2.13622	0.021944
CG3124	FBgn0034840	182.781	-1.43933	0.368738	0.0479106				tim	FBgn0014396	13117.8	1.01906	2.02659	0.00661159
Mst57Da	FBgn0011668	548.128	-1.52253	0.348076	0.0325165				Lsp1beta	FBgn0002563	7437.61	1.01074	2.01495	0.0217395
CG17097	FBgn0265264	2059.52	-1.53783	0.344402	0.0150898				CG2233	FBgn0029990	6306.75	0.964561	1.95147	0.0481662
CG45080	FBgn0266455	1510.32	-1.59349	0.33137	0.0150898				Obp99c	FBgn0039682	8217.91	0.942894	1.92238	0.0337966
Ebp	FBgn0004181	2435.6	-1.60617	0.32847	0.00464072				CG17108	FBgn0032285	21274.7	0.861987	1.81754	0.0139199
CG33340	FBgn0053340	283.047	-1.64719	0.319262	0.00249993				mt:lrRNA	FBgn0013686	88132.1	0.702858	1.62773	0.0233808
CG17376	FBgn0042189	262.626	-1.66553	0.315229	0.0121479				Ppn	FBgn0003137	6837.38	0.556193	1.47038	0.0175778
CG4836	FBgn0038762	774.185	-1.86202	0.275092	0.00150027				Eaat1	FBgn0026439	7376.1	0.405354	1.32441	0.0155843
Ppi1	FBgn0051025	219.462	-1.90335	0.267322	0.000634482				Toll-6	FBgn0036494	3531.4	0.399894	1.31941	0.0233808
FASN2	FBgn0042627	2121.17	-1.94193	0.260268	0.000162062				CG34417	FBgn0085446	27160.7	-0.400067	0.757823	0.0442551
CG7910	FBgn0037547	296.48	-1.96946	0.255349	0.000305871				nudE	FBgn0036059	2202.58	-0.476286	0.718826	0.0111342
lcs	FBgn0028583	3349.83	-2.2314	0.212953	7.0941e-08				CG11791	FBgn0039266	1961.54	-0.778055	0.583152	0.000743037
CG31198	FBgn0051198	469.553	-2.54437	0.171422	3.82906e-08				Act57B	FBgn0000044	4541.29	-0.801409	0.573789	0.025822
whe	FBgn0031176	1136.22	-3.29329	0.102005	1.10862e-13				bt	FBgn0005666	43092.2	-0.804273	0.572651	0.0112982
CG16826	FBgn0032505	15462.2	-3.80593	0.0714993	5.17925e-46				Mhc	FBgn0264695	27054.2	-0.857894	0.551757	0.0111342
									CG4928	FBgn0027556	7522.52	-1.01144	0.496051	0.0217395
									sls	FBgn0086906	67803.6	-1.01278	0.49559	7.56049e-05
									CG2839	FBgn0031273	996.171	-1.42635	0.372072	0.0299206

## Sheet: 24h-AR vs 1h-AR
MB- 24h-AR vs 1h-AR. Mean gene count >50. FDR <0.05									WH- 24h-AR vs 1h-AR. Mean gene count >50. FDR <0.05
Gene Name	Flybase ID	baseMean	Log2 Fold Change	Fold Difference	FDR Q Value				Gene Name	Flybase ID	baseMean	Log2 Fold Change	Fold Difference	FDR Q Value
CG16826	FBgn0032505	15462.2	2.55698	5.88476	7.19048e-16				tobi	FBgn0261575	5219.52	1.65005	3.13844	0.000587202
Cyp309a1	FBgn0031432	402.386	1.6412	3.11924	2.92065e-05				Yp3	FBgn0004047	7992.6	1.15894	2.23293	0.0399621
tobi	FBgn0261575	2317.41	1.58095	2.99167	0.00402583				CG8929	FBgn0034504	3991.57	1.08465	2.12086	0.0402976
Tps1	FBgn0027560	3297.58	1.55453	2.93738	0.000294827				IP3K2	FBgn0266375	4491.13	1.07933	2.11306	0.000111181
CG5853	FBgn0032167	255.865	1.468	2.76638	0.00946927				puf	FBgn0039214	6359.28	0.88635	1.84849	0.0100154
CG7997	FBgn0034117	336.912	1.46532	2.76124	0.000659597				fry	FBgn0016081	9599.74	0.723822	1.65155	0.0288323
Hf	FBgn0014000	115.191	1.40858	2.65476	0.0296828				B52	FBgn0004587	9640.81	0.719538	1.64665	0.0367534
Yp1	FBgn0004045	933.49	1.39906	2.63731	0.0273996				CG34126	FBgn0083962	5691.77	0.559094	1.47334	0.0430547
Spat	FBgn0014031	348.538	1.37889	2.60068	0.0219645				hiw	FBgn0030600	12574	0.44424	1.3606	0.0430547
lz	FBgn0002576	304.624	1.33062	2.51511	0.0476276				faf	FBgn0005632	15738	0.402721	1.322	0.0322323
CG15695	FBgn0038832	206.004	1.28621	2.43886	0.00982176				ZAP3	FBgn0052685	5189.52	0.388023	1.3086	0.0410529
CG33120	FBgn0053120	155.806	1.24862	2.37613	1.12017e-07				EndoA	FBgn0038659	9148.6	-0.460261	0.726855	0.0410529
Tsf1	FBgn0022355	13939.5	1.24755	2.37437	0.00181037				Pka-C1	FBgn0000273	23279.4	-0.524458	0.69522	2.14e-07
CG9449	FBgn0036875	116.086	1.1747	2.25746	0.0337063				CG45050	FBgn0266410	19169.4	-0.606643	0.656723	0.00479668
CG32032	FBgn0043806	217.668	1.13197	2.19157	0.0476276				Tsp97E	FBgn0039465	6806.82	-0.640358	0.641554	0.0332513
CG13318	FBgn0037627	94.0261	1.11004	2.15852	0.000433021				CG14989	FBgn0035495	23877.2	-0.659221	0.63322	0.0351308
aft	FBgn0026309	205.821	1.08874	2.12688	0.00923989				jef	FBgn0033958	9483.08	-0.679041	0.62458	0.0332513
ade5	FBgn0020513	1792.68	1.0753	2.10716	8.22907e-06				CG5758	FBgn0032666	8105.26	-0.703263	0.614181	0.043184
CG11236	FBgn0031860	91.8188	1.04027	2.05662	0.0457722				alpha-Est8	FBgn0015576	2344.52	-0.749464	0.594824	0.000231494
Pbp95	FBgn0037540	127.661	1.0178	2.02483	0.0464761				Vmat	FBgn0260964	11070.7	-0.754361	0.592809	0.00479668
Mon1	FBgn0031640	255.57	0.980472	1.97311	0.0168962				14-3-3epsilon	FBgn0020238	25251.9	-0.815756	0.568111	0.0410529
FASN1	FBgn0027571	43315.7	0.962553	1.94875	2.48922e-05				Syx13	FBgn0036341	919.948	-0.834524	0.560768	0.0410529
Arc1	FBgn0033926	4204.11	0.896644	1.86173	0.0176697				CG11138	FBgn0030400	11198.7	-0.835973	0.560205	0.0165841
Ing3	FBgn0030945	329.233	0.89361	1.85782	0.00158609				jeb	FBgn0086677	21574.3	-0.929165	0.525162	0.0112057
CG7705	FBgn0038639	278.787	0.887339	1.84976	0.00163977				Hydr2	FBgn0014906	1688.64	-0.932808	0.523838	0.027494
CG10495	FBgn0032750	99.8286	0.865879	1.82245	0.0309454				CG11388	FBgn0034959	793.969	-1.05611	0.480927	0.023754
p115	FBgn0040087	356.184	0.839825	1.78983	0.00923989				CG6503	FBgn0040606	10538.1	-1.10653	0.464408	0.0407126
CG5877	FBgn0030625	338.696	0.836311	1.78548	0.00192437				mt:ND5	FBgn0013684	15022.4	-1.147	0.451563	0.0211711
Patsas	FBgn0029137	433.525	0.825569	1.77223	0.0426918				CG11791	FBgn0039266	1961.54	-1.26119	0.417201	1.16344e-05
fus	FBgn0023441	5894.31	0.816797	1.76149	0.0145502				mt:ND1	FBgn0013679	23705.2	-1.29475	0.407606	0.00152373
Spn28Dc	FBgn0031973	142.402	0.81283	1.75665	0.0176697				Obp49a	FBgn0050052	1716.52	-1.35694	0.39041	0.0100154
AcCoAS	FBgn0012034	13311.3	0.799552	1.74056	6.32157e-05				CG14277	FBgn0032008	4368.33	-1.57523	0.335591	0.00195143
by	FBgn0000244	1576.07	0.775451	1.71172	0.000988278
CG6574	FBgn0037846	232.103	0.753922	1.68637	0.000768088
RpL18	FBgn0035753	2074.43	0.752307	1.68448	0.0063456
c(3)G	FBgn0000246	116.406	0.74016	1.67036	3.00968e-06
CG34376	FBgn0085405	2442.49	0.715237	1.64175	8.53233e-05
Gmap	FBgn0027287	2979.92	0.688233	1.61131	4.02987e-05
CG34120	FBgn0083956	6591.42	0.664965	1.58553	0.00222021
Sec5	FBgn0266670	444.247	0.633225	1.55103	0.000659597
CG42663	FBgn0261545	1912.83	0.605253	1.52125	0.00158609
mRpL28	FBgn0031660	286.991	0.411156	1.32975	1.97244e-05
Rbp	FBgn0262483	43322.5	-0.387838	0.764274	0.0420069
Sap130	FBgn0262714	4817.14	-0.431845	0.741313	4.97518e-12
Sema1a	FBgn0011259	39867.6	-0.435234	0.739574	0.0191994
PIP4K	FBgn0039924	4459.61	-0.471201	0.721364	0.0345304
toy	FBgn0019650	31899.7	-0.471565	0.721182	0.00202623
bru3	FBgn0264001	86958.1	-0.498117	0.70803	0.0326761
Syt4	FBgn0028400	14062.5	-0.54048	0.687542	0.00222021
CG6765	FBgn0035903	3341.98	-0.586657	0.665884	0.0296828
CG17816	FBgn0037525	43594.9	-0.589266	0.664681	0.000493102
Syngr	FBgn0033876	7919.48	-0.607259	0.656443	0.0191994
CG32204	FBgn0052204	22408.2	-0.636568	0.643241	0.00960285
jeb	FBgn0086677	25837.8	-0.827266	0.563596	0.00603335
Pzl	FBgn0267430	20877.2	-1.01427	0.49508	0.0154641
